# Supplementary material for: Transcriptional Comparison of Human and Murine Retinal Neovascularization
Source: PubMed Central journal article supplement (PMC10756240; doi:10.1167/iovs.64.15.46), 2023-12-28
Supplement: iovs-64-15-46_s001.pdf [file iovs-64-15-46_s001.pdf]

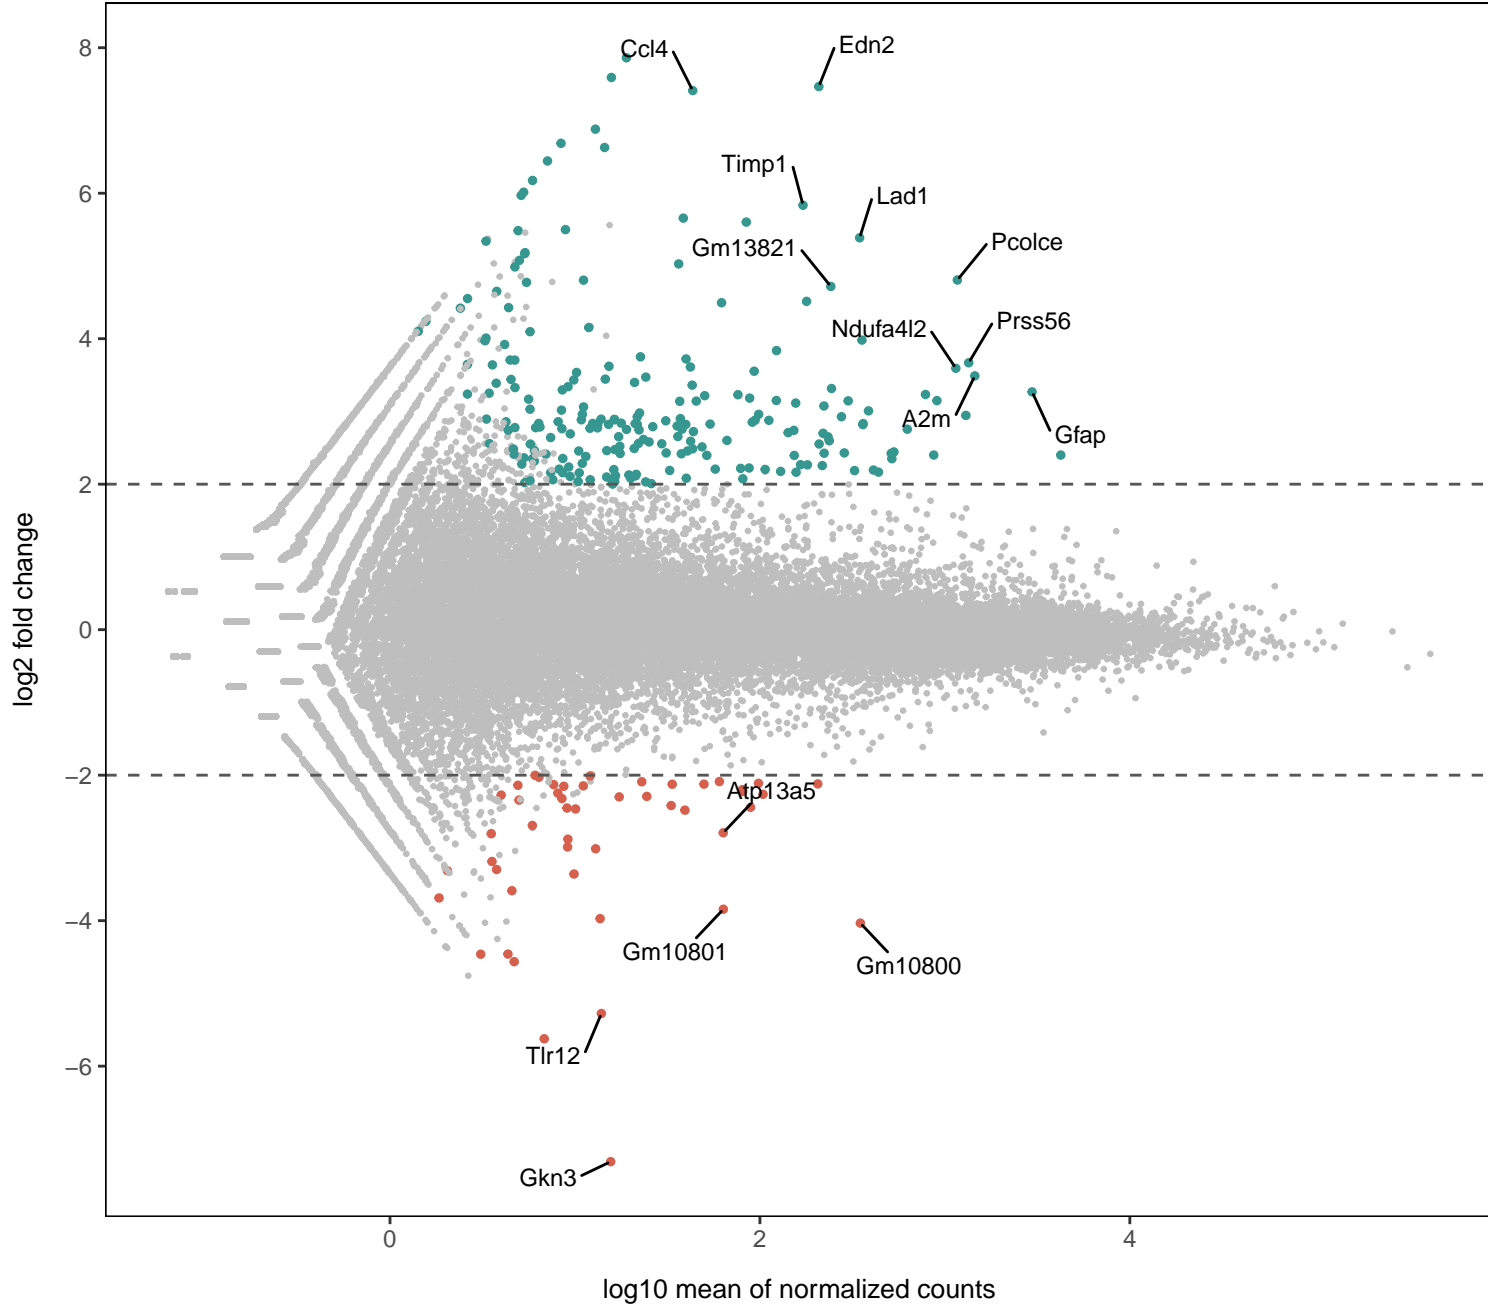

**Suppl. Figure 1: Differentially expressed genes at OIR p14.** Scatter plot showing the logarithm of normalized mean reads versus log<sub>2</sub> fold change at OIR p14. Upregulated DEG are shown in turquoise, while downregulated ones are shown in red. The 10 most highly expressed and upregulated as well as the 5 most highly expressed and downregulated DEG are annotated.
