# Supplementary material for: Transcriptional Comparison of Human and Murine Retinal Neovascularization
Source: PubMed Central journal article supplement (PMC10756240; doi:10.1167/iovs.64.15.46), 2023-12-28
Supplement: iovs-64-15-46_s002.pdf [file iovs-64-15-46_s002.pdf]

CD52

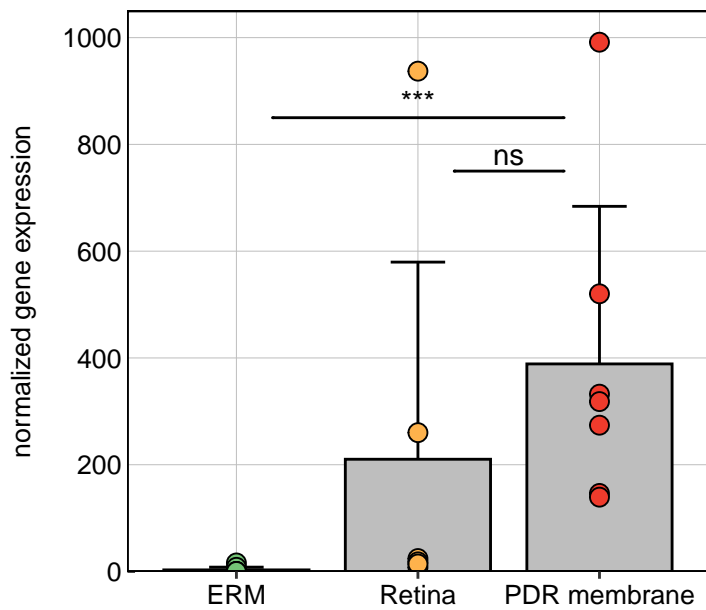

S100A8

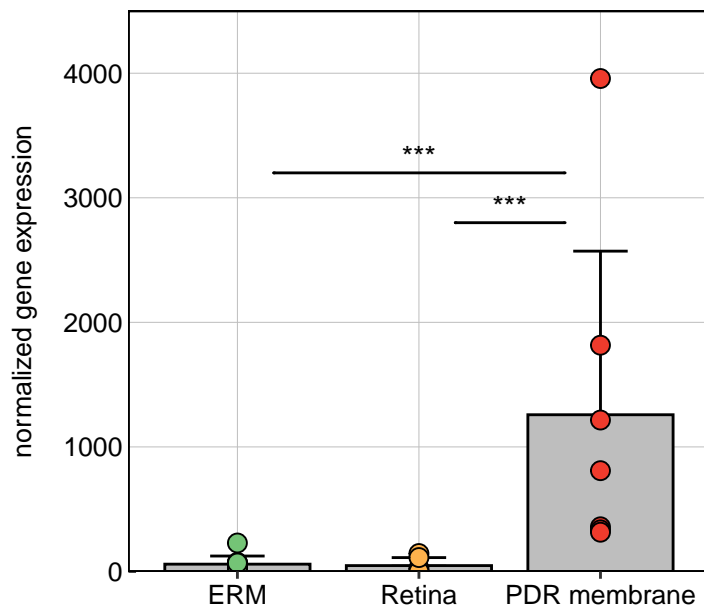

CD34

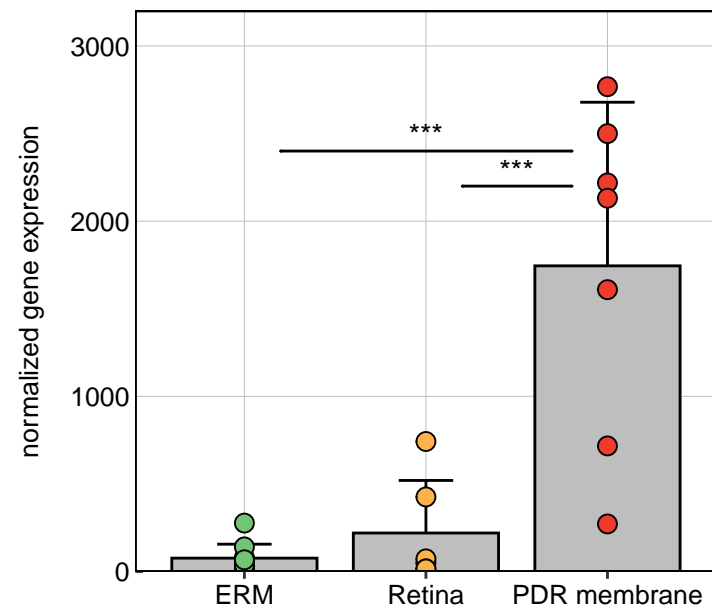

EDNRA

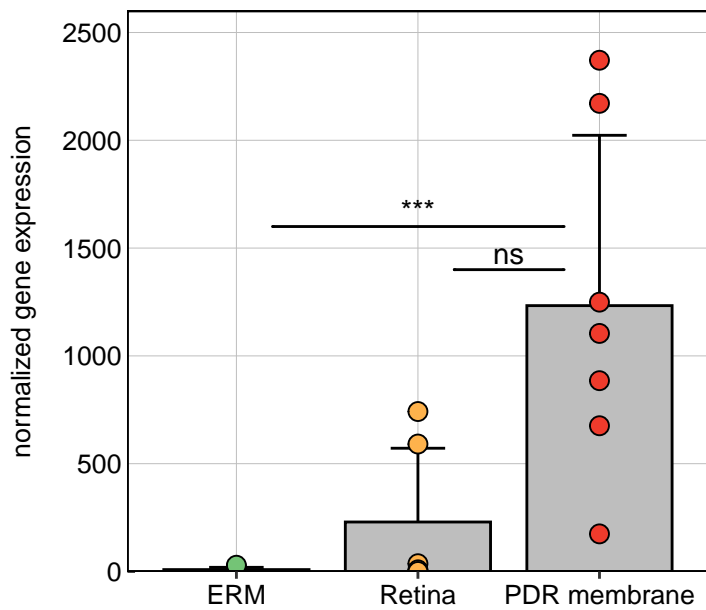

ANGPT2

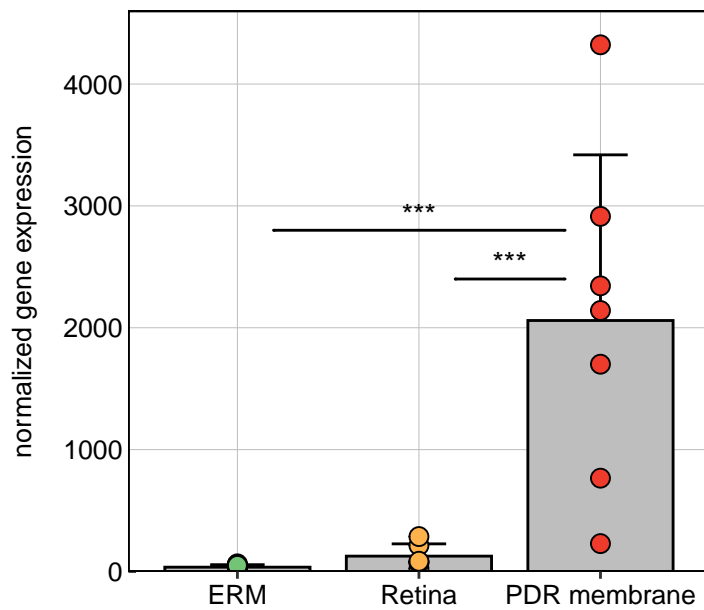

ANGPTL2

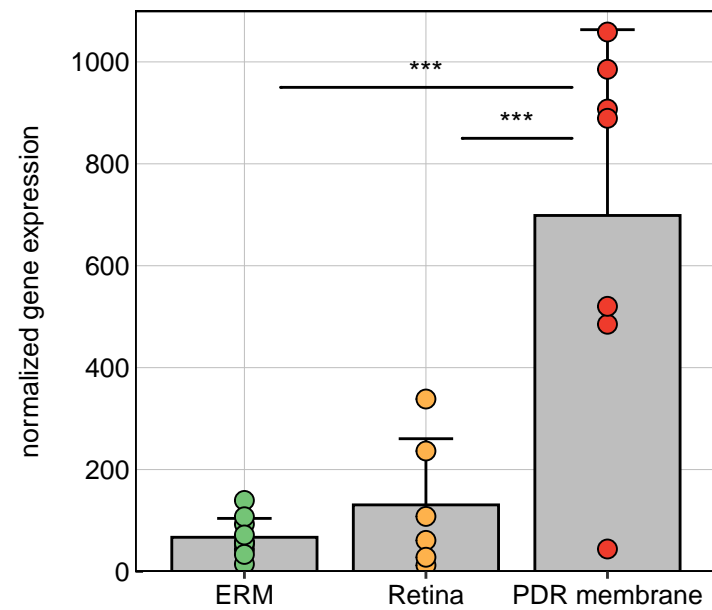

MRC1

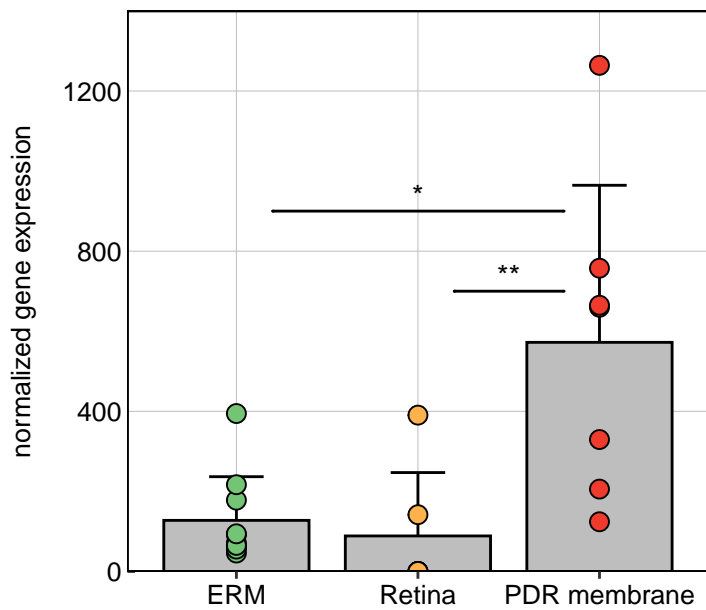

MCAM

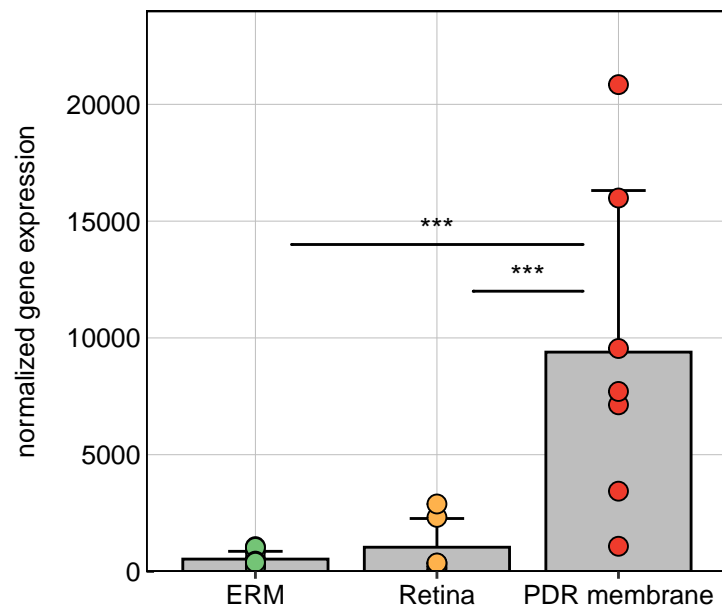

COL4A1

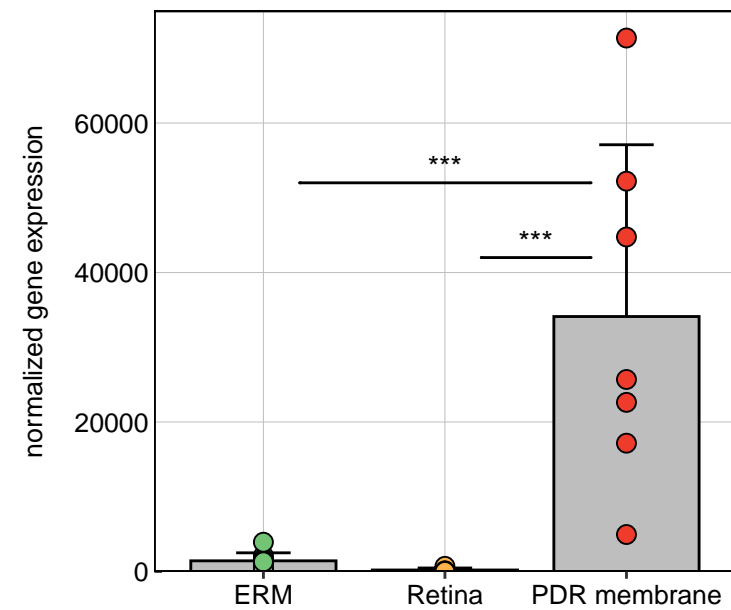

COL4A2

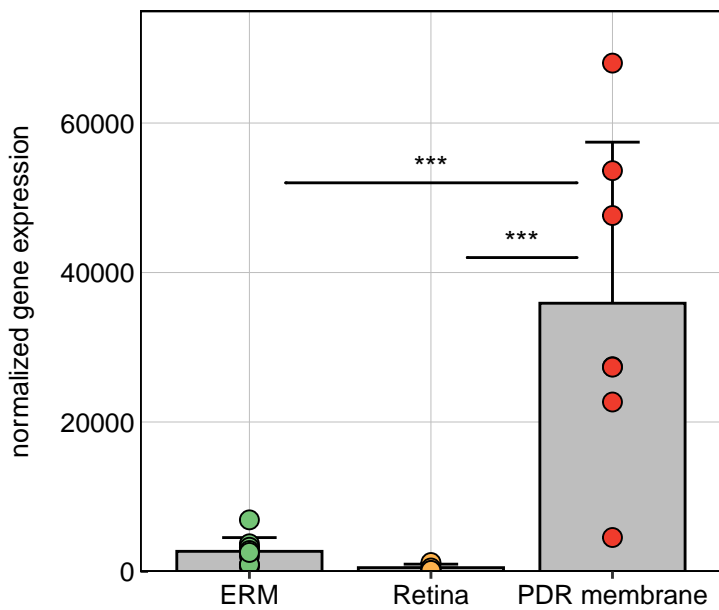

CCR7

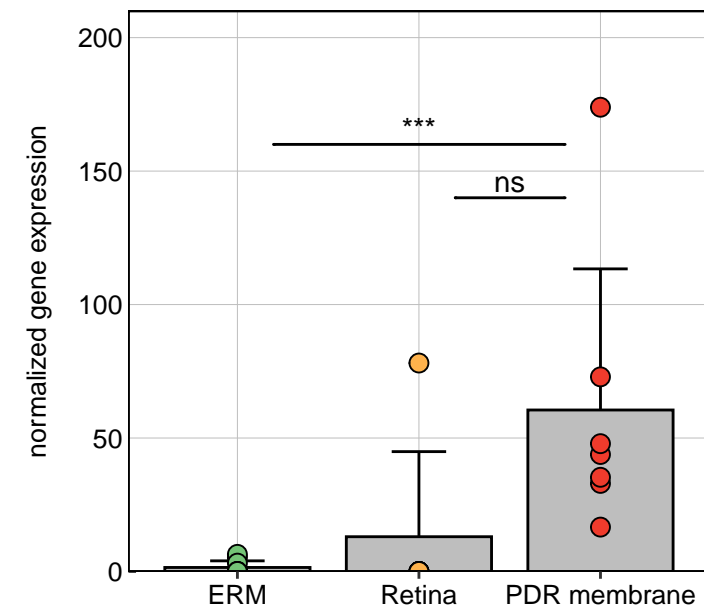

**Suppl. Figure 2: Phylogenetically conserved key mediators of RNV are not only upregulated compared to epiretinal membranes, but also compared to healthy retinal tissue.** Bar graphs showing normalized gene expression. Each point is one sample.
