# Supplementary material for: Transcriptional Comparison of Human and Murine Retinal Neovascularization
Source: PubMed Central journal article supplement (PMC10756240; doi:10.1167/iovs.64.15.46), 2023-12-28
Supplement: iovs-64-15-46_s003.pdf [file iovs-64-15-46_s003.pdf]

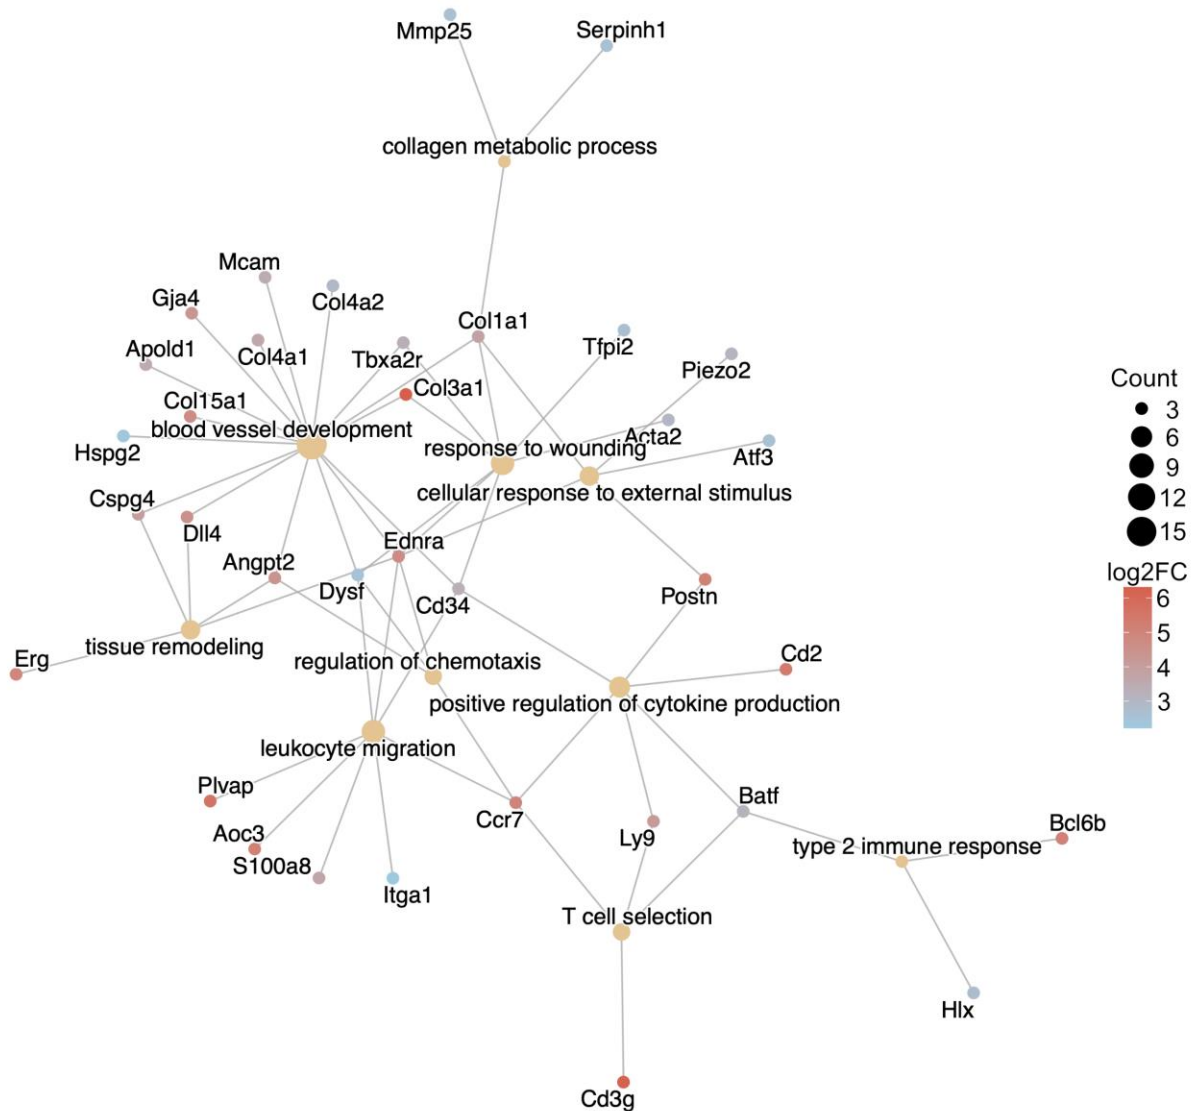

**Suppl. Figure 3: Full network analysis of gene ontology (GO) clusters and associated differentially expressed genes (DEG) most significantly upregulated.**

Circle size (ocher circles) codes for the number of upregulated DEG in each GO cluster, while the color of each gene (other circles) represents the respective log2 fold change (log2FC).
