# Supplementary material for: Transcriptional Comparison of Human and Murine Retinal Neovascularization
Source: PubMed Central journal article supplement (PMC10756240; doi:10.1167/iovs.64.15.46), 2023-12-28
Supplement: iovs-64-15-46_s004.pdf [file iovs-64-15-46_s004.pdf]

|                          | Murine       |              |              |              | Human             |                    |
|--------------------------|--------------|--------------|--------------|--------------|-------------------|--------------------|
|                          | nOIR<br>p14  | nOIR<br>p17  | OIR<br>p14   | OIR<br>p17   | ERM               | PDR                |
| <b>n</b>                 | 7            | 6            | 6            | 8            | 10                | 7                  |
| <b>Number of litters</b> | 3            | 2            | 4            | 3            | -                 | -                  |
| <b>% female</b>          | 57%          | 33%          | 67%          | 25%          | 30%               | 29%                |
| <b>mean weight (SD)</b>  | 7.0<br>(0.6) | 7.1<br>(1.1) | 4.7<br>(0.4) | 5.8<br>(0.8) | -                 | -                  |
| <b>mean age (SD)</b>     | 14<br>days   | 17<br>days   | 14<br>days   | 17<br>days   | 71 years<br>(6.8) | 38 years<br>(14.8) |

**Suppl. Table 1: Characteristics of the murine and human samples included in this study.** Six or more mice from 2 or more litters were analyzed for each murine group. The percentage of female mice varied between p14 and p17 groups, but it was similar within the comparisons between controls (nOIR) and oxygen-induced retinopathy (OIR) groups at each timepoint, as well as between the epiretinal membrane (ERM) and proliferative diabetic retinopathy (PDR) groups. OIR pups were only included between the weight limits of 5 to 7.5 g for p17 in keeping with previous reports.<sup>19</sup>

| Sym_human | Sym_mouse | log2FC_human | p_adj_human | log2FC_mouse | p_adj_mouse |
|-----------|-----------|--------------|-------------|--------------|-------------|
| COL3A1    | Col3a1    | 10,17444631  | 2,80304E-53 | 2,450114092  | 0,009085394 |
| COL5A2    | Col5a2    | 2,978040826  | 1,39181E-14 | 2,576228784  | 1,98336E-08 |
| KCNE4     | Kcne4     | 5,317856859  | 1,84086E-18 | 2,34508251   | 0,005515108 |
| ASPM      | Aspm      | 2,147561217  | 0,01054472  | 2,626799608  | 0,01987514  |
| LY9       | Ly9       | 5,250162301  | 1,4084E-09  | 3,044952022  | 0,028400154 |
| HLX       | Hlx       | 2,500982796  | 1,15232E-08 | 2,991870314  | 1,14219E-08 |
| CENPF     | Cenpf     | 2,333585047  | 1,04425E-09 | 2,508081328  | 8,385E-08   |
| ATF3      | Atf3      | 2,649435215  | 6,96912E-07 | 2,564181064  | 6,61814E-05 |
| CD34      | Cd34      | 4,488775886  | 4,11571E-29 | 2,108797403  | 2,22801E-05 |
| CCDC3     | Ccdc3     | 2,197601827  | 7,46426E-05 | 2,215114952  | 0,002247177 |
| MRC1      | Mrc1      | 2,139150896  | 0,011776623 | 2,49236979   | 0,034683967 |
| PKN3      | Pkn3      | 2,643562489  | 1,92112E-13 | 2,213321263  | 4,83301E-07 |
| ANGPTL2   | Angptl2   | 3,357434718  | 4,64825E-22 | 2,51553891   | 7,5937E-10  |
| OLFML2A   | Olfml2a   | 2,020790437  | 5,34888E-09 | 2,368022716  | 2,95077E-09 |
| SLC43A1   | Slc43a1   | 2,328438834  | 9,36028E-09 | 4,447201144  | 1,50646E-09 |
| DLL4      | Dll4      | 6,947336197  | 7,37297E-35 | 2,096677036  | 0,006833169 |
| DUSP2     | Dusp2     | 3,14929292   | 2,26236E-10 | 2,094003739  | 0,001041483 |
| MALL      | Mall      | 3,849685199  | 1,28449E-09 | 2,844788857  | 0,000341947 |
| CD93      | Cd93      | 3,331205238  | 5,74041E-39 | 2,527794122  | 6,16107E-18 |
| REM1      | Rem1      | 3,680313729  | 7,38617E-08 | 2,716837112  | 0,003109857 |
| TPX2      | Tpx2      | 2,024209388  | 4,84747E-07 | 2,372627568  | 7,03351E-07 |
| FAM83D    | Fam83d    | 3,163964154  | 6,95194E-06 | 3,497689535  | 0,000112072 |
| POSTN     | Postn     | 7,86740624   | 1,41815E-33 | 2,316130764  | 0,012923191 |
| RARRES1   | Rarres1   | 2,451516236  | 1,50481E-06 | 2,079471299  | 0,002735629 |
| FCRL2     | Fcrls     | 2,587971955  | 0,00030853  | 2,884663561  | 2,60485E-09 |
| S100A8    | S100a8    | 4,419544302  | 3,24588E-08 | 2,937755462  | 0,046819248 |

|          |          |             |             |             |             |
|----------|----------|-------------|-------------|-------------|-------------|
| CD2      | Cd2      | 6,457310412 | 5,49318E-10 | 4,162155054 | 0,029778615 |
| COL15A1  | Col15a1  | 6,33910222  | 1,29492E-44 | 3,00650078  | 2,06572E-07 |
| RHBDL2   | Rhbdl2   | 2,060703357 | 1,39086E-06 | 2,387259063 | 7,15605E-06 |
| GJA4     | Gja4     | 6,502901629 | 1,69598E-20 | 2,112689175 | 0,043366886 |
| FAM167B  | Fam167b  | 5,98893846  | 9,4518E-42  | 6,953455593 | 6,1375E-15  |
| CD52     | Cd52     | 7,037177864 | 6,65946E-30 | 2,548094231 | 0,001840974 |
| HSPG2    | Hspg2    | 2,24171976  | 3,77152E-11 | 2,443340508 | 4,26236E-10 |
| FBLIM1   | Fblim1   | 3,429373062 | 3,18305E-39 | 2,705216598 | 1,06667E-17 |
| MSX1     | Msx1     | 4,976204944 | 4,22468E-15 | 2,212062941 | 0,015978524 |
| NCAPG    | Ncapg    | 2,478865456 | 7,54491E-06 | 2,075141519 | 0,005593165 |
| TFPI2    | Tfpi2    | 2,044791589 | 0,007415082 | 3,291383995 | 0,000775609 |
| GNG11    | Gng11    | 2,203345441 | 1,51228E-18 | 2,215749084 | 1,54344E-14 |
| PRR15    | Prr15    | 2,000822368 | 0,001171001 | 2,223546816 | 0,013544865 |
| DYSF     | Dysf     | 2,659077142 | 7,88033E-14 | 2,253569732 | 1,57946E-07 |
| EGR4     | Egr4     | 2,348256558 | 0,047771437 | 2,819206698 | 9,24126E-05 |
| CLEC1A   | Clec1a   | 3,213504573 | 3,9413E-13  | 2,583212485 | 1,4021E-06  |
| APOLD1   | Apold1   | 4,715142217 | 5,54435E-25 | 2,268408688 | 8,62462E-05 |
| ARHGDIB  | Arhgdib  | 2,16986336  | 3,33135E-22 | 2,046715037 | 4,13021E-15 |
| FOSB     | Fosb     | 4,262063422 | 1,09925E-07 | 3,289978419 | 0,002292114 |
| CKM      | Ckm      | 3,961828621 | 3,45964E-06 | 2,5946809   | 0,009089245 |
| EXOC3L2  | Exoc3l2  | 9,151456676 | 4,42868E-52 | 2,360438786 | 0,000943848 |
| SERPINH1 | Serpinh1 | 2,665845532 | 4,05659E-42 | 2,447813223 | 2,21098E-28 |
| IL21R    | Il21r    | 2,171522969 | 0,000948169 | 2,114296235 | 0,026630619 |
| COL4A1   | Col4a1   | 4,556990327 | 2,07229E-32 | 2,766184292 | 1,01285E-09 |
| COL4A2   | Col4a2   | 3,710794894 | 9,51364E-25 | 2,14746048  | 8,16667E-07 |
| ANGPT2   | Angpt2   | 5,843000169 | 2,83034E-62 | 2,903063655 | 1,36215E-12 |
| PLVAP    | Plvap    | 9,116611169 | 9,76184E-55 | 2,049652341 | 0,013945581 |

|         |         |             |             |             |             |
|---------|---------|-------------|-------------|-------------|-------------|
| TPM4    | Tpm4    | 2,117732946 | 5,4246E-22  | 2,010086738 | 9,32227E-16 |
| EDNRA   | Ednra   | 7,127533046 | 3,02704E-40 | 2,247872422 | 0,001519476 |
| ADGRG3  | Adgrg3  | 6,688700741 | 1,47587E-13 | 2,031559328 | 0,023772328 |
| CNN1    | Cnn1    | 2,360129952 | 1,11346E-06 | 2,359431632 | 0,001089498 |
| FLI1    | Fli1    | 2,450035551 | 6,30951E-23 | 2,007784194 | 5,72079E-12 |
| MCAM    | Mcam    | 4,123700499 | 5,37079E-34 | 2,702767555 | 9,60306E-12 |
| CD3G    | Cd3g    | 9,063047643 | 3,44548E-23 | 3,399972943 | 0,029625339 |
| CSPG4   | Cspg4   | 5,610309824 | 1,44826E-48 | 2,309358686 | 8,68296E-07 |
| SLCO2A1 | Slco2a1 | 5,374133213 | 5,73149E-19 | 2,051727518 | 0,022058307 |
| FAM162B | Fam162b | 8,188314643 | 6,06537E-13 | 3,983249692 | 0,041888308 |
| TBXA2R  | Tbxa2r  | 3,825990391 | 1,79146E-25 | 2,818407072 | 1,21431E-10 |
| KCNMB1  | Kcnmb1  | 2,31381301  | 1,50696E-07 | 2,496991961 | 8,17934E-06 |
| BTNL9   | Btnl9   | 3,622797636 | 0,007775227 | 5,300408794 | 0,009745992 |
| AURKB   | Aurkb   | 2,375854134 | 0,001301105 | 5,606890742 | 1,21283E-09 |
| BCL6B   | Bcl6b   | 7,92892908  | 1,96741E-44 | 2,338652895 | 0,00180216  |
| COL1A1  | Col1a1  | 3,352585079 | 2,17387E-11 | 4,345516491 | 4,39632E-14 |
| CCR7    | Ccr7    | 5,311782119 | 1,03524E-05 | 4,626177788 | 0,022020461 |
| AOC3    | Aoc3    | 7,949075281 | 4,32728E-37 | 2,290283645 | 0,00226779  |
| HIGD1B  | Higd1b  | 6,404330989 | 5,74168E-36 | 2,351057762 | 0,000105584 |
| CD79B   | Cd79b   | 2,918896576 | 0,000614328 | 2,828945508 | 0,021398415 |
| BIRC5   | Birc5   | 2,233813984 | 2,47548E-05 | 3,576253562 | 8,51488E-09 |
| RRM2    | Rrm2    | 2,304106206 | 4,36122E-06 | 3,435766532 | 3,88973E-09 |
| BATF    | Batf    | 2,964333734 | 2,91342E-09 | 3,430558923 | 5,66335E-05 |
| EDARADD | Edaradd | 6,220702978 | 3,21012E-11 | 2,848203966 | 0,018654953 |
| NID1    | Nid1    | 5,644033797 | 3,01196E-49 | 2,322644611 | 6,21082E-07 |
| OGN     | Ogn     | 2,01755801  | 0,000905107 | 2,17621333  | 0,004975583 |
| HK3     | Hk3     | 2,578725404 | 9,92109E-06 | 2,027808565 | 0,01524426  |

|         |         |             |             |             |             |
|---------|---------|-------------|-------------|-------------|-------------|
| ITGA1   | Itga1   | 2,429321534 | 5,84557E-15 | 2,022109525 | 3,40376E-08 |
| RNASE1  | Rnase1  | 3,536595008 | 7,75716E-10 | 4,693162526 | 2,32012E-05 |
| ESCO2   | Esco2   | 2,336040009 | 0,000540878 | 2,710945422 | 0,005703686 |
| GPIHBP1 | Gpihbp1 | 8,506362487 | 3,6146E-24  | 4,000980296 | 6,61459E-08 |
| GTSE1   | Gtse1   | 2,648082827 | 0,000196812 | 2,173733982 | 0,028434196 |
| OLIG1   | Olig1   | 3,505513624 | 0,000892646 | 3,331331771 | 0,015616599 |
| RIPPLY3 | Ripply3 | 2,424324219 | 0,017540114 | 2,426460427 | 0,029986403 |
| ERG     | Erg     | 7,365882117 | 6,09317E-80 | 2,444481363 | 8,16667E-07 |
| MMP25   | Mmp25   | 2,483062263 | 1,1221E-08  | 2,813809559 | 3,40086E-08 |
| NDC80   | Ndc80   | 3,219313488 | 1,6897E-11  | 3,217412021 | 1,48197E-07 |
| PCDH12  | Pcdh12  | 3,997797335 | 6,2772E-25  | 2,537917895 | 7,39904E-08 |
| PIEZO2  | Piezo2  | 2,95229404  | 1,24366E-15 | 3,291741683 | 5,30104E-14 |
| CD248   | Cd248   | 5,232806324 | 1,69727E-42 | 3,723270151 | 3,39212E-17 |
| ACTA2   | Acta2   | 2,35497604  | 2,30354E-08 | 3,676160081 | 4,28356E-15 |

**Suppl. Table 2: Phylogenetically conserved mediators of retinal neovascularization**

**(RNV).** Phylogenetically conserved human (Sym\_human) and murine (Sym\_murine) DEG with respective log2 fold change (log2FC) and adjusted p-value (p\_adj) for the comparison in human and murine (OIR p17) samples.
